# Supplementary material for: Prediction of lung function and lung density of young adults who had bronchopulmonary dysplasia
Source: PubMed Central journal article supplement — ERJ Open Res. 2020 Oct 26;6(4):00157-2020. doi: 10.1183/23120541.00157-2020 (PMC7682661; doi:10.1183/23120541.00157-2020), 2020-10-26
Supplement: 00157-2020.SUPPLEMENT.pdf [file 00157-2020.SUPPLEMENT.pdf]

## Supplementary material

CT scanning for emphysema.

Emphysema, although defined in morbid anatomical terms, can now be diagnosed and quantified non-invasively with computed tomography. Various parameters derived from the frequency distribution histogram of lung voxel densities have been proposed as accurate measures. The most widely applied parameters are the percentile point and voxel index methods. The percentile point is defined as the cut off value in Hounsfield units (HU) below which a specified percentage of all voxels are distributed, and the voxel index is defined as the proportion of lung voxels of low density below a specified threshold. In the only study to validate the percentile point method against a pathological standard, comparison between alveolar wall surface area per unit volume (AWUV) and CT densitometry was restricted to the 15<sup>th</sup> percentile point. Therefore we applied the 15<sup>th</sup> percentile point to analyse the density of lung tissue in our study population as described in *Respir Med.* 2007;101:1924-30.

Table S1. Clinical data of Healthy Premature and Hyaline Membrane Disease groups

|                                                       | Healthy preterm | HMD         | Missing<br>(healthy/HMD) | P-value |
|-------------------------------------------------------|-----------------|-------------|--------------------------|---------|
| <b>Male</b>                                           | 11/14 (79%)     | 7/14 (50%)  | 0                        | 0.12    |
| <b>Mean weeks of pregnancy (SD)</b>                   | 31.8 (2.9)      | 30.3 (2,1)  | 0                        | 0.13    |
| <b>Mean birth weight, gram (SD)</b>                   | 1605 (467)      | 1363 (391)  | 0                        | 0.15    |
| <b>Mean birth weight percentiles (SD)</b>             | 52 (35)         | 53 (24)     | 0                        | 0.94    |
| <b>Surfactant therapy</b>                             | 0/14            | 11/14 (79%) | 0                        | <0.001  |
| <b>Prenatal dexamethasone</b>                         | 4/14 (29%)      | 3/14 (21%)  | 0                        | 0.68    |
| <b>Postnatal dexamethasone</b>                        | 0/14            | 0/14        | 0                        |         |
| <b>Gestational corrected age at LF in months (SD)</b> | 7.3 (4.2)       | 12.0 (1.3)  | 1/0                      | 0.00049 |
| <b>Crown-heel length at LF in cm (SD)</b>             | 66 (11)         | 75 (3)      | 1/0                      | 0.010   |
| <b>Mean FRC z-score for CHL (SD)</b>                  | -0.06 (0.77)    | 0.15 (1.24) | 1/0                      | 0.59    |
| <b>Mean Compliance z-score for CHL (SD)</b>           | 0.09 (1.11)     | 0.53 (0.95) | 1/0                      | 0.28    |
| <b>Mean Mixing Efficiency percent (SD)</b>            | 53 (7)          | 59 (11)     | 2/0                      | 0.12    |

Legend to Table S1. Prenatal dexamethasone was administered antepartum to mothers if admitted on time before delivery to the hospital. Mean weeks of pregnancy and mean birth weight were not significantly different between groups.

Table S2 Lung function and density at adulthood.

|                             | Non-BPD, mean (SD) | BPD, mean (SD) | Mean difference of BPD - non-BPD* (99.5% CI) | Ancova* p-value |
|-----------------------------|--------------------|----------------|----------------------------------------------|-----------------|
| <b>zFEV<sub>1</sub>/FVC</b> | 0.00 (1.14)        | -1.28 (1.60)   | -1.22 (-2.21, -0.23)                         | 0.00011         |
| <b>zFEV<sub>1</sub></b>     | -0.27 (1.24)       | -2.00 (1.61)   | -1.71 (-2.82, -0.60)                         | 0.00044         |
| <b>zFVC</b>                 | -0.28 (1.18)       | -1.18 (1.29)   | -0.93 (-1.85, -0.01)                         | 0.010           |
| <b>zDLCO</b>                | -0.16 (0.78)       | -0.80 (0.83)   | -0.62 (-1.19, -0.05)                         | 0.00063         |
| <b>zFRC</b>                 | 0.08 (1.13)        | -0.04 (1.19)   | -0.14 (-1.00, 0.73)                          | 0.53            |
| <b>zTLC</b>                 | -0.73 (1.32)       | -1.20 (1.31)   | -0.48 (-1.52, 0.56)                          | 0.57            |
| <b>zRV/TLC</b>              | -0.10 (1.69)       | 1.17 (1.93)    | 1.31 (-0.02, 2.65)                           | 0.012           |
| <b>ME</b>                   | 46.3 (12.1)        | 38.5 (12.9)    | -7.8 (-17.2, 1.7)                            | 0.12            |
| <b>SMS</b>                  | -0.12 (1.18)       | -1.11 (1.22)   | -1.02 (-1.89, -0.15)                         | 0.0009          |
| <b>SGRQ</b>                 | 3.4 (4.7)          | 9.2 (9.0)      | 5.9 (0.3, 11.5)                              | 0.022           |

Legend to Table S2. Mean difference of BPD - non-BPD\* and ANCOVA\* valuables were corrected for covariables 'birthweight percentile' and 'smoking' after prior confirmation of independence of these covariates. zFEV<sub>1</sub>/FVC, zFEV<sub>1</sub>, zFVC, zDLCO are z-scores for adult lung function outcomes with GLI-references. zFRC, zTLC, zRV/TLC are z-scores for adult lung function outcomes with ERS-references. ME is mixing efficiency of Helium in-wash, SMS is

standard mass score. SGRQ, St. George's Respiratory Questionnaire. Significance level of ANCOVA was set at  $p < 0.005$ .

Table S3. Regression analysis of infant lung function on outcomes in BPD-group

| Adult outcome parameters | Lung function at GCA 1 year | B      | unadjusted p value | adjusted R <sup>2</sup> |
|--------------------------|-----------------------------|--------|--------------------|-------------------------|
| zFEV <sub>1</sub> /FVC   | Infant FRC perc pred        | -0.025 | 0.034              | 0.12                    |
|                          | Infant Compliance perc pred | 0.016  | 0.098              | 0.06                    |
|                          | Infant Mixing Efficiency    | 0.009  | 0.63               | -0.03                   |
| zFEV <sub>1</sub>        | Infant FRC perc pred        | -0.017 | 0.14               | 0.04                    |
|                          | Infant Compliance perc pred | 0.014  | 0.11               | 0.06                    |
|                          | Infant Mixing Efficiency    | 0.023  | 0.23               | 0.02                    |
| zDLCO                    | Infant FRC perc pred        | 0.014  | 0.023              | 0.13                    |
|                          | Infant Compliance perc pred | 0.010  | 0.029              | 0.12                    |
|                          | Infant Mixing Efficiency    | 0.018  | 0.029              | 0.11                    |
| SMS                      | Infant FRC perc pred        | -0.004 | 0.67               | -0.03                   |
|                          | Infant Compliance perc pred | -0.006 | 0.32               | 0.00                    |
|                          | Infant Mixing Efficiency    | -0.006 | 0.66               | -0.03                   |
| SGRQ                     | Infant FRC perc pred        | 0.026  | 0.68               | -0.03                   |
|                          | Infant Compliance perc pred | -0.024 | 0.64               | -0.03                   |
|                          | Infant Mixing Efficiency    | -0.083 | 0.35               | 0.00                    |

Legend Table S3.

Univariate linear regression models were used to define if lung function at GCA 1 year (gestational corrected age 1 year) predicts outcome parameters at adulthood. None of the dependent variables at adulthood reached a significance level set at  $p < 0.003$  by Bonferroni correction. zFEV<sub>1</sub>/FVC, zFEV<sub>1</sub>, zFVC, zDLCO are z-scores for adult lung function outcomes with GLI-references and ECCS references, respectively.
